# Supplementary material
Source: PubMed Central journal article supplement (PMC3936588)

## SUPPLEMENTARY DATA

Fig. S1. A phylogenetic analysis of pollinators of *Pterostylis sanguinea* using the mtDNA CO1 region. KP = Kings Park; SS = Star Swamp; SP = Shenton Park. Numbers in parentheses denote multiple identical sequences.

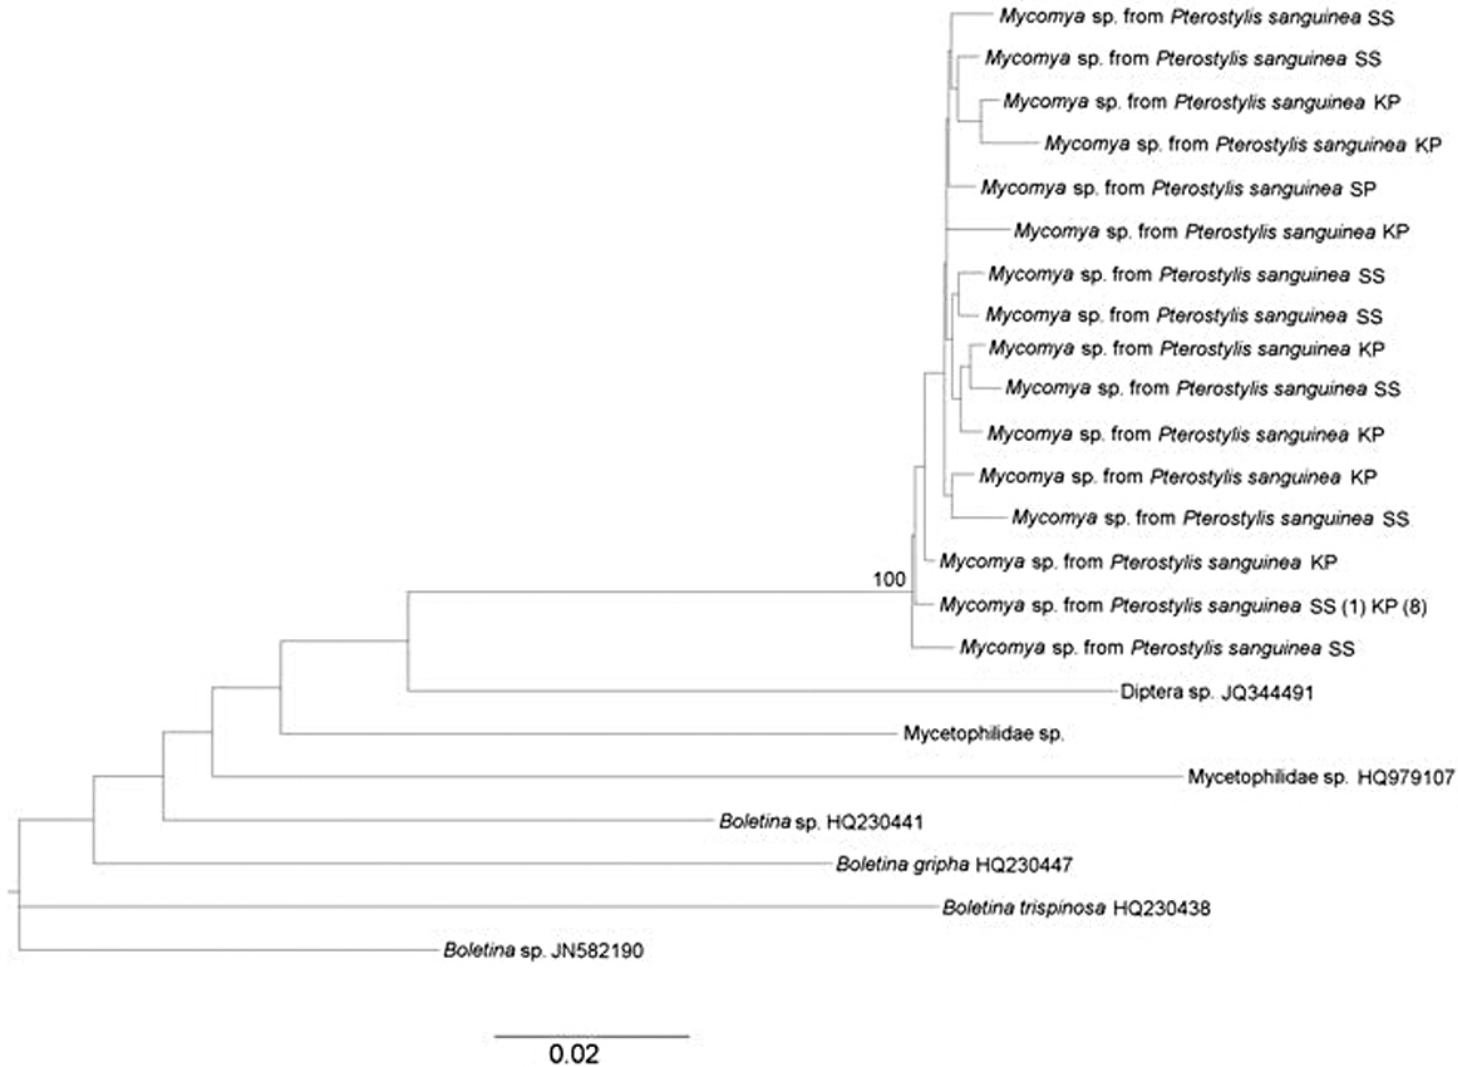

Supplement: supp_mct295_mct295supp.pdf [file supp_mct295_mct295supp.pdf]
